# Supplementary material
Source: PubMed Central journal article supplement (PMC5063704)
Supplement: NIHMS812256-supplement-216_2016_9871_MOESM1_ESM.pdf [file NIHMS812256-supplement-216_2016_9871_MOESM1_ESM.pdf]

**Analytical and Bioanalytical Chemistry**

**Electronic Supplementary Material**

**Study of the degradation of a multidrug transporter using a non-radioactive pulse chase method**

Qian Chai, Stacy R. Webb, Zhaoshuai Wang, Rebecca E. Dutch, Yanan Wei

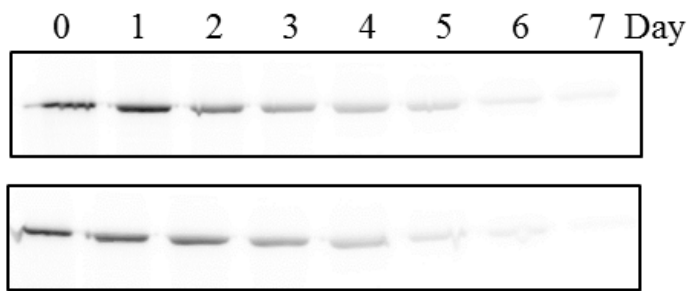

**Fig. S1** Results from two additional repeats of the S35-Met pulse chase experiment result (see Fig. 2)

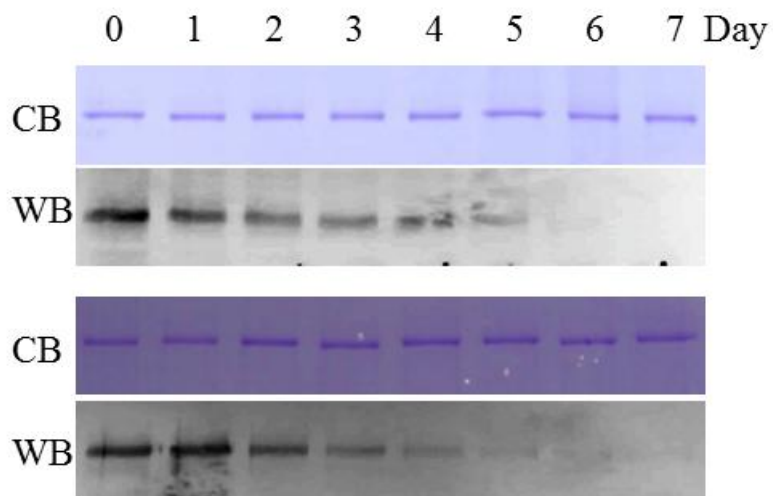

**Fig. S2** Results from two additional repeats of the AcrB degradation experiments detected using the AHA labeling method (see Fig. 3)

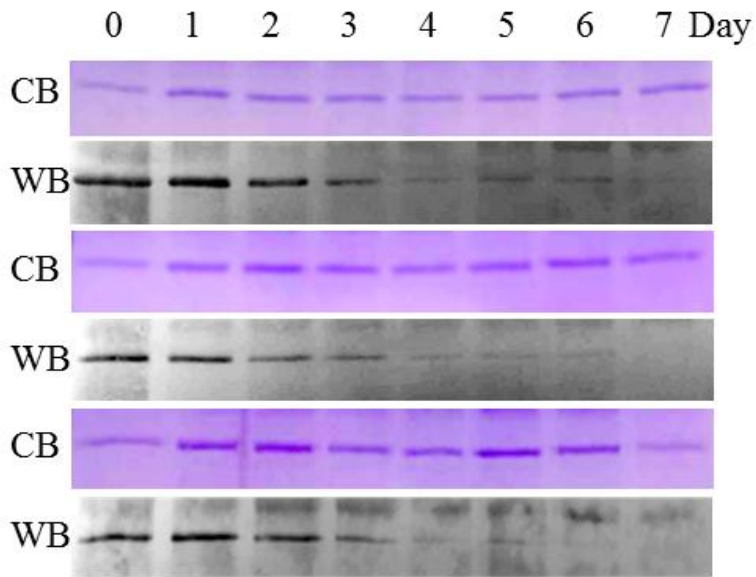

**Fig. S3** Results from three repeats of the AcrA degradation experiments detected using the AHA labeling method (see Fig. 5)
